# Supplementary material
Source: PubMed Central journal article supplement (PMC1305620)
Supplement: biophysj_104.058800_1.pdf [file biophysj_104.058800_1.pdf]

## Supplementary Material

Table 1 Mean values of the Cremer–Pople puckering parameters for each pyranose ring at the reducing and non-reducing ends of each disaccharide (CH, C4S, C6S, and HA).

The mean value of the third puckering parameter,  $\phi_{CP}$ , is not included because it was uniformly distributed in each case.  $\theta_{CP} = 0^\circ$  indicates a  ${}^4C_1$  chair conformation (Cremer and Pople, 1975) and the absence of error estimates indicates that the estimated error was less than the smallest significant figure shown.

|            |                 | At Reducing Terminus         |                                   | At Non-reducing Terminus     |                                   |
|------------|-----------------|------------------------------|-----------------------------------|------------------------------|-----------------------------------|
|            |                 | $\langle Q_{CP} \rangle$ (Å) | $\langle \theta_{CP} \rangle$ (°) | $\langle Q_{CP} \rangle$ (Å) | $\langle \theta_{CP} \rangle$ (°) |
| <b>CH</b>  | <b>GlcUA</b>    | 0.58                         | $8.6 \pm 0.3$                     | 0.57                         | $8.8 \pm 0.2$                     |
|            | <b>GalNAc</b>   | 0.57                         | $8.7 \pm 0.4$                     | 0.58                         | $8.2 \pm 0.4$                     |
| <b>C4S</b> | <b>GlcUA</b>    | 0.58                         | $8.6 \pm 0.2$                     | 0.57                         | $8.8 \pm 0.3$                     |
|            | <b>GalNac4S</b> | 0.58                         | $8.1 \pm 0.6$                     | 0.58                         | $8.0 \pm 0.2$                     |
| <b>C6S</b> | <b>GlcUA</b>    | 0.58                         | $8.6 \pm 0.4$                     | 0.57                         | $8.7 \pm 0.3$                     |
|            | <b>GalNac6S</b> | 0.57                         | $9.1 \pm 0.5$                     | 0.58                         | $8.2 \pm 0.5$                     |
| <b>HA</b>  | <b>GlcUA</b>    | 0.58                         | $8.7 \pm 0.4$                     | 0.57                         | $8.6 \pm 0.3$                     |
|            | <b>GlcNAc</b>   | 0.58                         | $8.4 \pm 0.3$                     | 0.57                         | $8.7 \pm 0.3$                     |

Table 2 Coarse-grained model bond lengths,  $b$ , valence angles,  $\theta$ , and torsion angles,  $\nu$ . A prime denotes that the atom belongs to the reducing sugar terminus.  $\phi$  and  $\psi$  denote the glycosidic torsion angles, the only flexible internal degrees of freedom present in the model.  $V_Q$  denotes the center of charge site used to model electrostatic interactions between charged monosaccharide units and  $V_G$  denotes the center of geometry (repulsive Lennard-Jones site) used to model steric interactions between non-adjacent monosaccharides.

| <b>Internal Coordinate</b><br>(Å or degrees) | <b>GlcUA</b><br>$J = 4, I = 3$ | <b>GlcNAc</b><br>$J = 3, I = 4$ | <b>GalNAc</b><br>$J = 3, I = 4$ | <b>GalNAc4S</b><br>$J = 3, I = 4$ | <b>GalNAc6S</b><br>$J = 3, I = 4$ |
|----------------------------------------------|--------------------------------|---------------------------------|---------------------------------|-----------------------------------|-----------------------------------|
| $b(O1'-CJ')$                                 | 1.42                           | 1.42                            | 1.42                            | 1.42                              | 1.42                              |
| $b(CJ'-C1')$                                 | 2.89                           | 2.52                            | 2.52                            | 2.52                              | 2.53                              |
| $b(C1'-O1')$                                 | 1.41                           | 1.41                            | 1.41                            | 1.41                              | 1.41                              |
| $b(C1'-V_G')$                                | 1.69                           | 1.51                            | 1.37                            | 1.72                              | 1.48                              |
| $b(C1'-V_Q')$                                | 3.31                           | <i>na</i>                       | <i>na</i>                       | 5.78                              | 5.90                              |
| $\theta(C1-O1-CJ')$                          | 117.5                          | 117.7                           | 117.6                           | 117.2                             | 117.7                             |
| $\theta(O1-CJ'-C1')$                         | 147.8                          | 144.0                           | 145.1                           | 144.4                             | 145.0                             |
| $\theta(CJ'-C1'-O1')$                        | 148.4                          | 144.6                           | 144.4                           | 144.4                             | 144.2                             |
| $\theta(CJ'-C1'-V_G')$                       | 6.1                            | 7.2                             | 10.0                            | 19.4                              | 26.3                              |
| $\theta(CJ'-C1'-V_Q')$                       | 42.8                           | <i>na</i>                       | <i>na</i>                       | 53.0                              | 86.3                              |
| $\phi(C1-C1-O1-CJ')$                         | -173.2                         | -110.9                          | -111.1                          | -112.2                            | -111.8                            |
| $\psi(C1-O1-CJ'-C1')$                        | -179.6                         | -123.2                          | -142.6                          | -137.0                            | -145.9                            |
| $\nu(O1-CJ'-C1'-O1')$                        | 171.4                          | 2.0                             | -1.7                            | -0.9                              | -1.6                              |
| $\nu(O1-CJ'-C1'-V_G')$                       | -76.7                          | -84.9                           | -31.8                           | -74.7                             | -113.4                            |
| $\nu(O1-CJ'-C1'-V_Q')$                       | 93.5                           | <i>na</i>                       | <i>na</i>                       | -73.9                             | -116.4                            |

## Glycosidic Linkage PMFs

The glycosidic linkage PMFs,  $F_{kl}^B(\phi, \psi)$ , computed from the all-atom disaccharide simulations are provided in tabulated form. The PMFs correspond to the virtual bond definition of the glycosidic linkage torsion angles (see **Topology** section and Table 2). In discretized form, the PMFs are given by,  $F_{kl}^B(\phi_i, \psi_j)$ , where

$\phi_i = -180 + \frac{\Delta\phi}{2} + i\Delta\phi$ ,  $\psi_j = -180 + \frac{\Delta\psi}{2} + j\Delta\psi$ , and using angle increments of  $\Delta\phi = \Delta\psi = 10$  degrees, ( $i$  and  $j = 0, 1, \dots, 35$ ). Rows and columns in the files correspond to the  $\phi$  and  $\psi$  degrees of freedom, respectively.

PMF filenames:

| $F_{kl}^B(\phi, \psi)$ | Glycosidic Linkage Type | Filename        |
|------------------------|-------------------------|-----------------|
| $F_{AB}^B(\phi, \psi)$ | CH $\beta$ 1,3          | pmf_ch_b13.txt  |
| $F_{BA}^B(\phi, \psi)$ | CH $\beta$ 1,4          | pmf_ch_b14.txt  |
| $F_{AC}^B(\phi, \psi)$ | C4S $\beta$ 1,3         | pmf_c4s_b13.txt |
| $F_{CA}^B(\phi, \psi)$ | C4S $\beta$ 1,4         | pmf_c4s_b14.txt |
| $F_{AD}^B(\phi, \psi)$ | C6S $\beta$ 1,3         | pmf_c6s_b13.txt |
| $F_{DA}^B(\phi, \psi)$ | C6S $\beta$ 1,4         | pmf_c6s_b14.txt |
| $F_{AE}^B(\phi, \psi)$ | HA $\beta$ 1,3          | pmf_ha_b13.txt  |
| $F_{EA}^B(\phi, \psi)$ | HA $\beta$ 1,4          | pmf_ha_b14.txt  |
